# Supplementary material for: Development of an efficient and sustainable synthesis of 2-(3-methyl-1 H -1,2,4-triazol-1-yl) acetic acid under continuous-flow conditions
Source: Royal Society of Chemistry journal article supplement (doi:10.1039/c9gc04286e), 2020-01-01

## Supporting Information

# Development of an Efficient and Sustainable Synthesis of 2-(3-Methyl-1*H*-1,2,4-triazol-1-yl) Acetic Acid under Continuous-Flow Conditions

*Simone Tortoioli,<sup>‡,\*</sup> Astrid Friedli,<sup>†</sup> Alice Prud'homme,<sup>‡</sup> Sylvia Richard-Bildstein,<sup>†</sup> Philipp Kohler,<sup>‡</sup> Stefan Abele,<sup>‡</sup> and Gianvito Vilé,<sup>†,§,\*</sup>*

<sup>†</sup>Chemistry Technologies & Lead Discovery, Department of Drug Discovery Chemistry, Idorsia Pharmaceuticals Ltd., Hegenheimermattweg 91, CH-4123 Allschwil, Switzerland.

<sup>‡</sup>Chemical Development & Commercial Manufacturing, Idorsia Pharmaceuticals Ltd., Hegenheimermattweg 91, CH-4123 Allschwil, Switzerland.

<sup>§</sup>Current address: Department of Chemistry, Materials and Chemical Engineering “Giulio Natta”, Politecnico di Milano, Piazza Leonardo da Vinci 32, IT-20131 Milano, Italy.

\*Corresponding authors. E-mails: [gianvito.vile@polimi.it](mailto:gianvito.vile@polimi.it), [simone.tortoioli@idorsia.com](mailto:simone.tortoioli@idorsia.com)

## *Analytical methods*

### **Gas chromatography–mass spectrometry**

ISQ LT

Injection volume: 0.30  $\mu$ L  
Column: Zebron ZB-5, 15mx0.25mm, 0.25 $\mu$ m  
Column flow: 1.20 mL/min  
Gas: Helium  
Method: 60 to 300 °C in 11.10 min  
50 to 650 amu\_EI+

The purity is given in area percent (% a/a).

### **Liquid chromatography–mass spectrometry**

Waters iClass, Thermo MSQ Plus and DAD

Injection volume: 0.15  $\mu$ L  
Column: Zorbax RRHD SB-AQ, 1.8  $\mu$ m, 2.1 $\times$ 50 mm  
Column flow: 0.8 mL/min  
Eluent: Water, 0.04% TFA (Eluent A)  
Acetonitrile (Eluent B)  
Gradient: 0.00 min 5% B  
1.20 min 95% B  
1.90 min 95% B  
2.1 min 5% B  
Temperature: 40°C

The purity is given in area percent (% a/a).

## Products characterization

### benzyl 2-(3-methyl-1*H*-1,2,4-triazol-1-yl)acetate

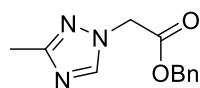

**11a**

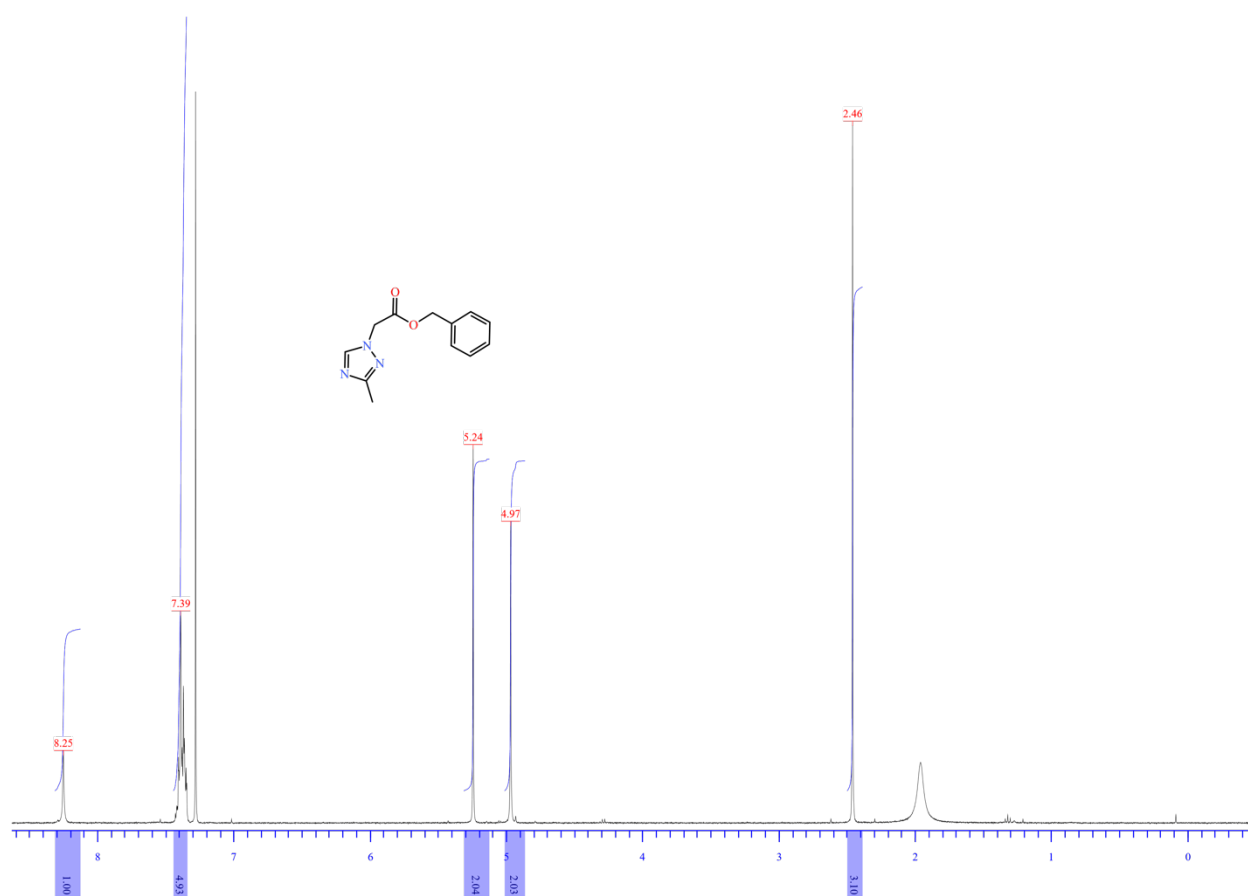

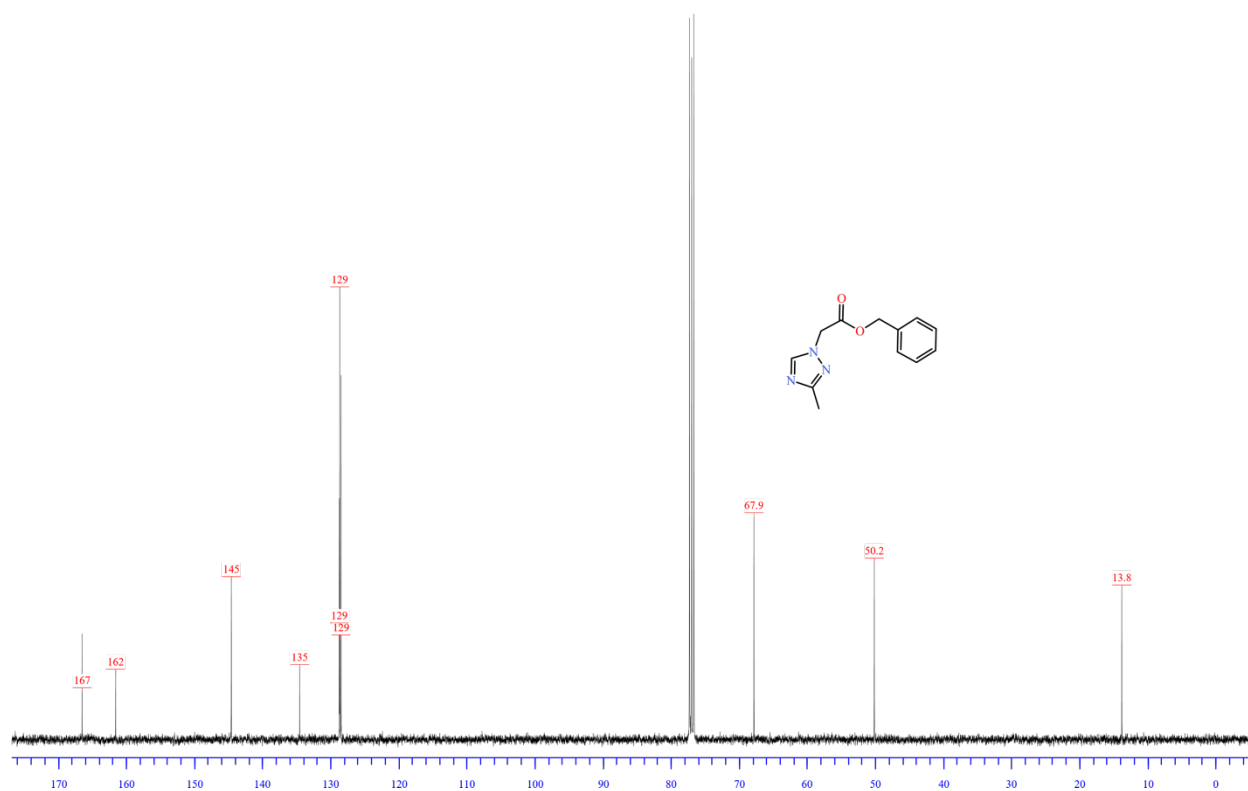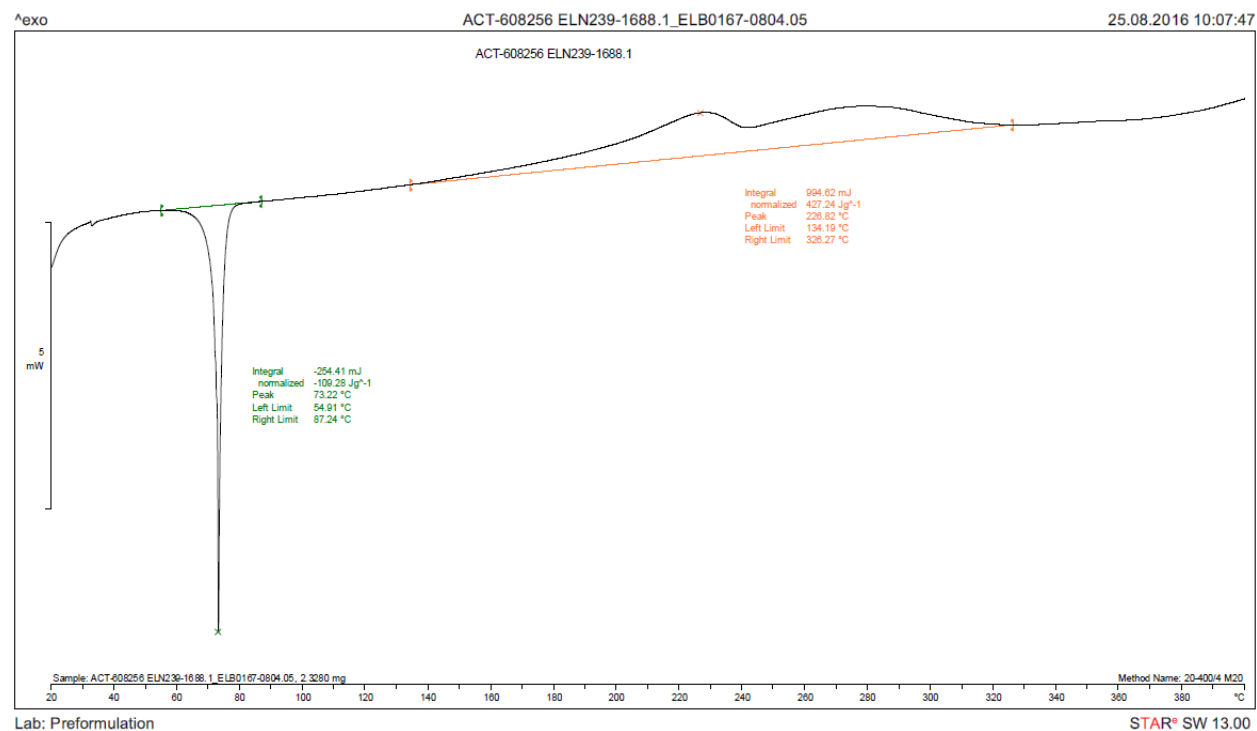

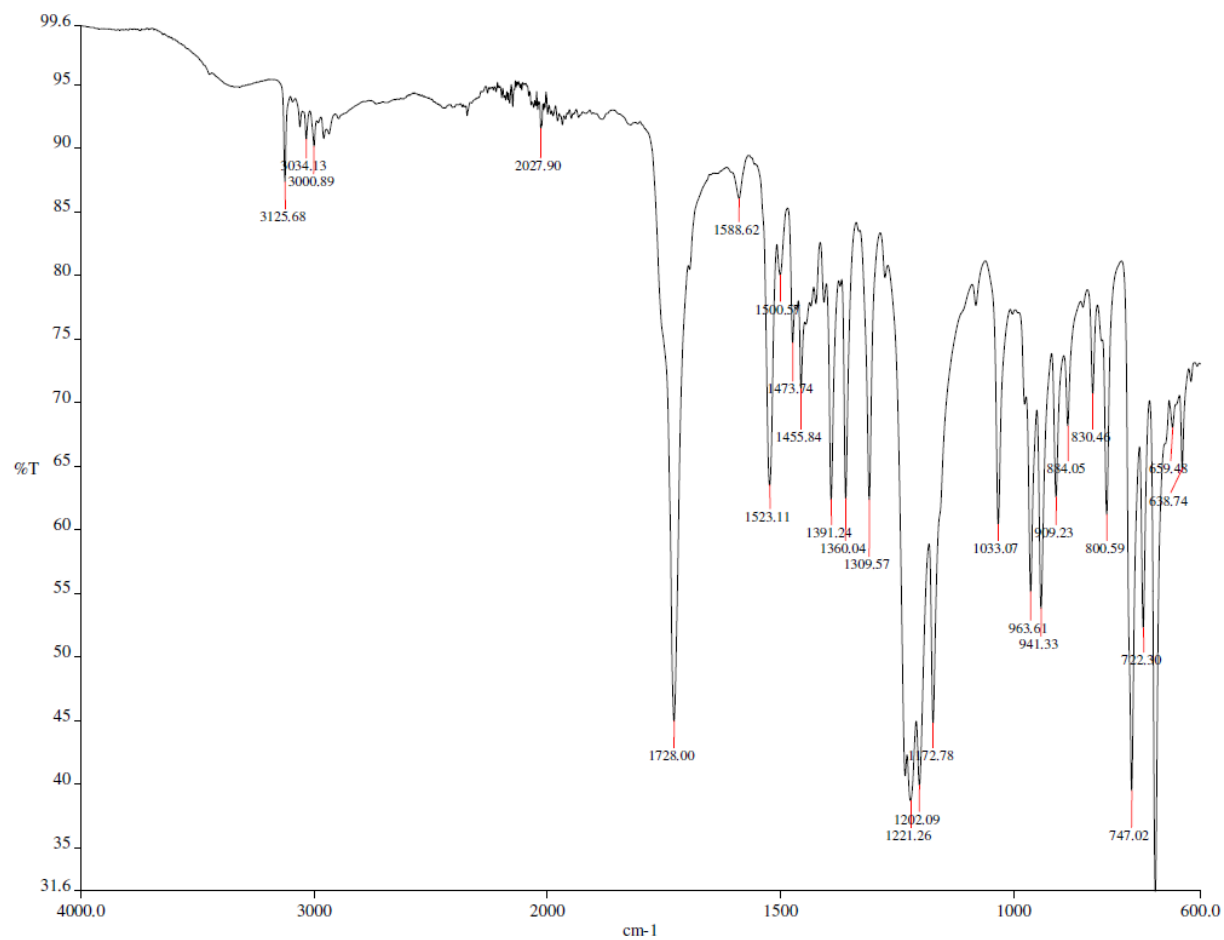

# 2-(3-methyl-1*H*-1,2,4-triazol-1-yl)acetic acid

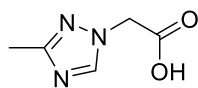

1

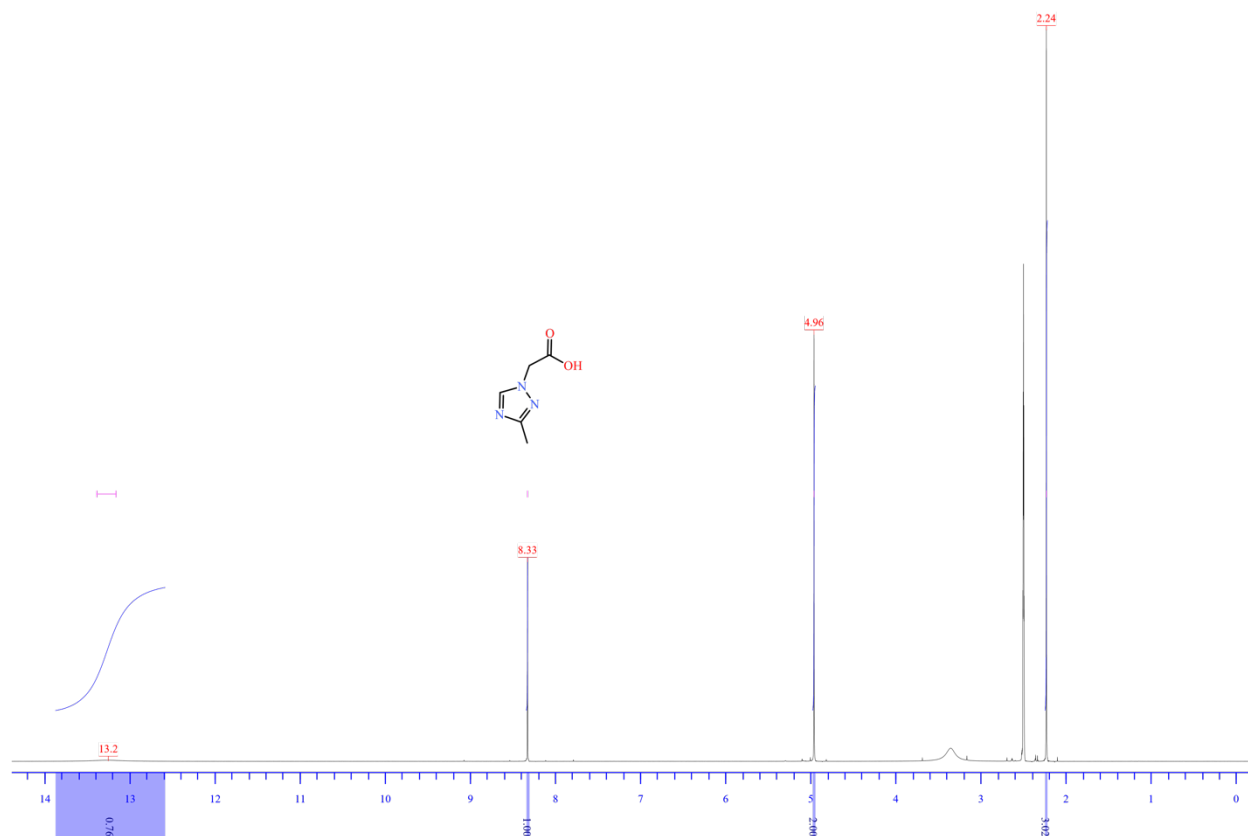

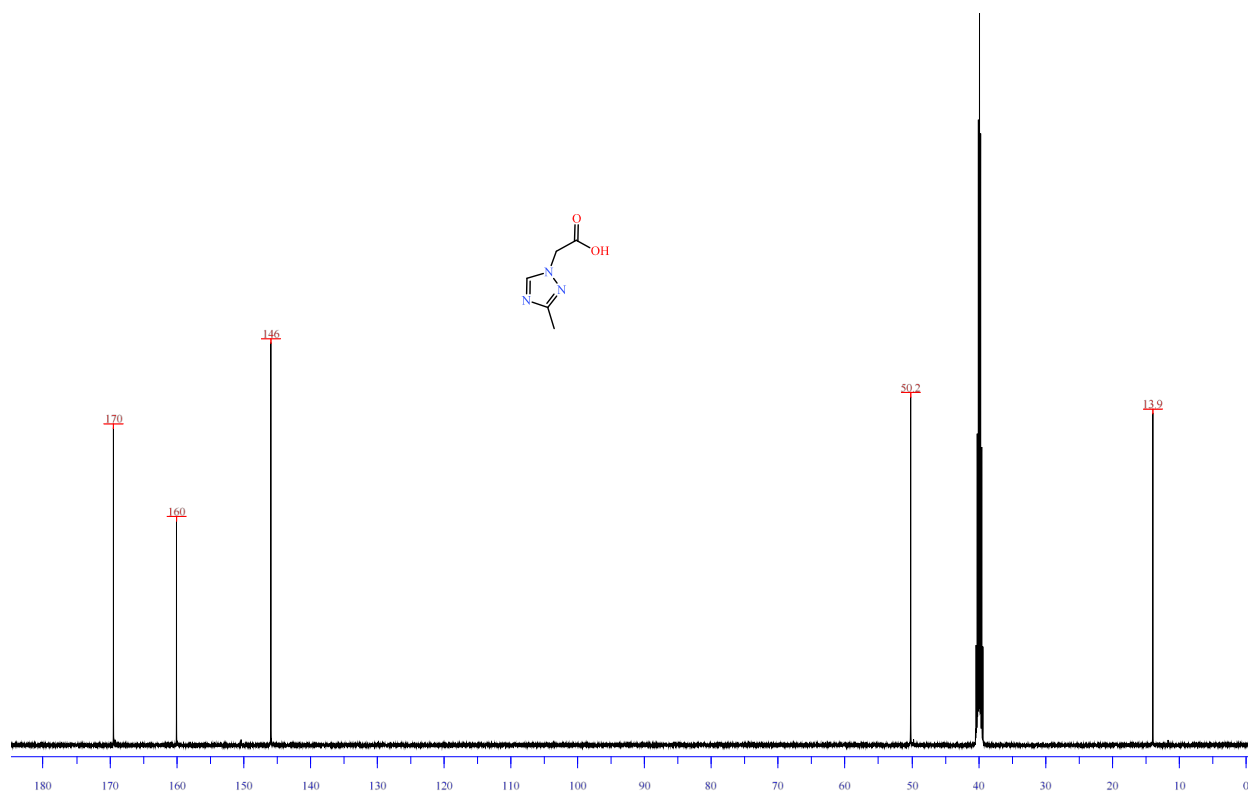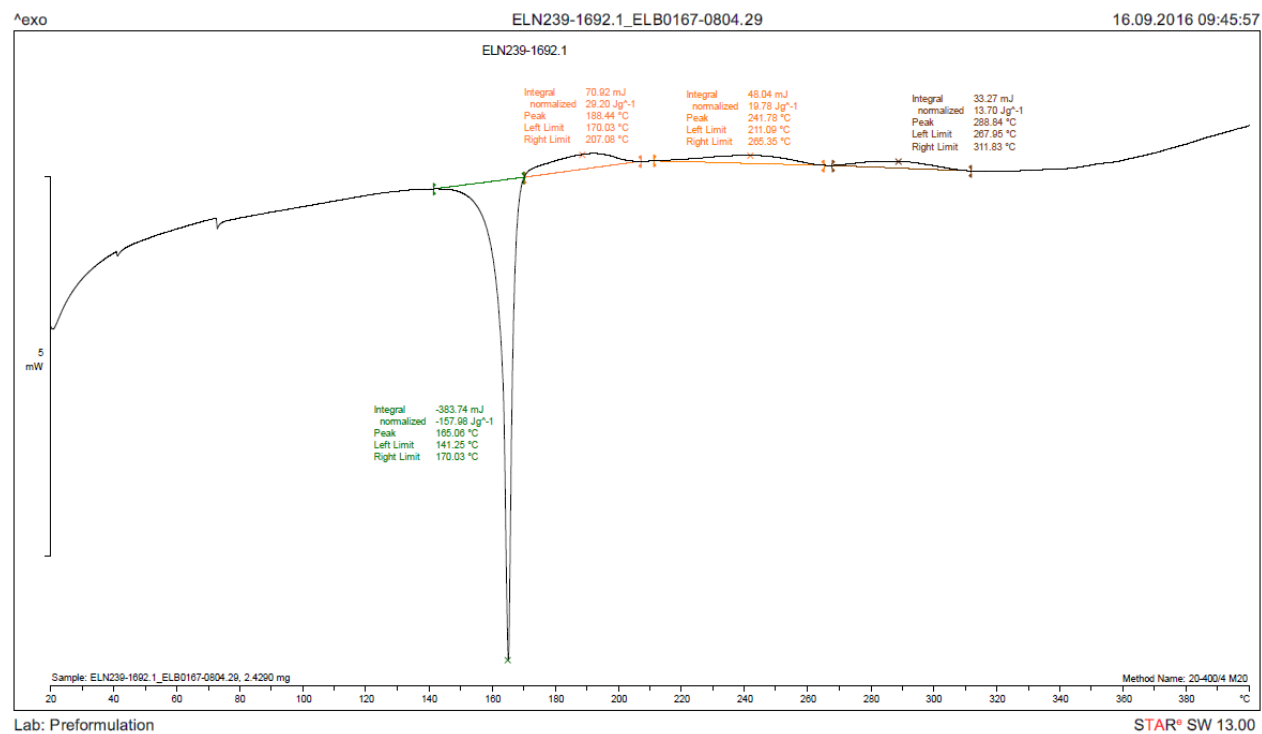

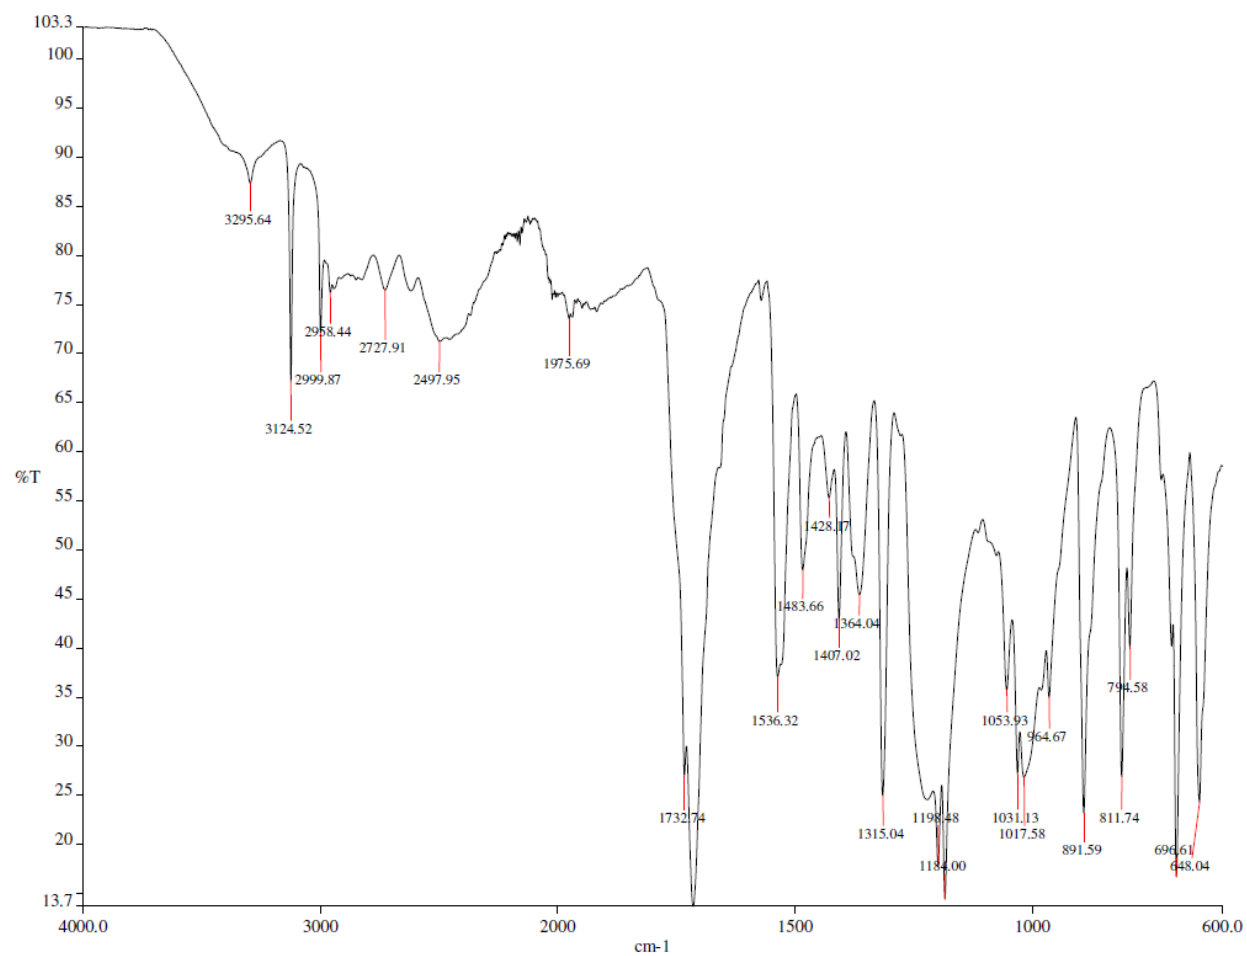



***N'*-formyl-*N,N*-dimethylacetimidamide**

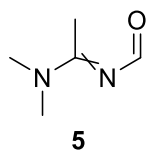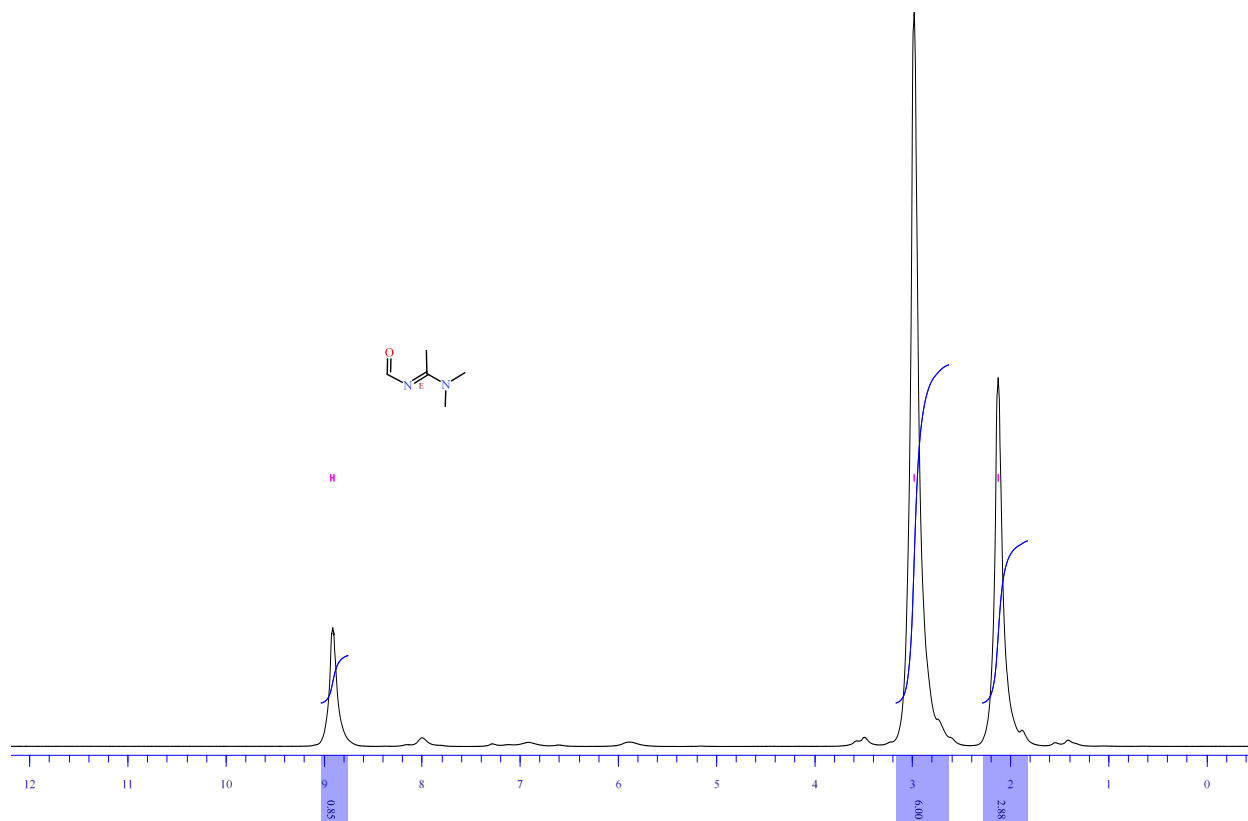

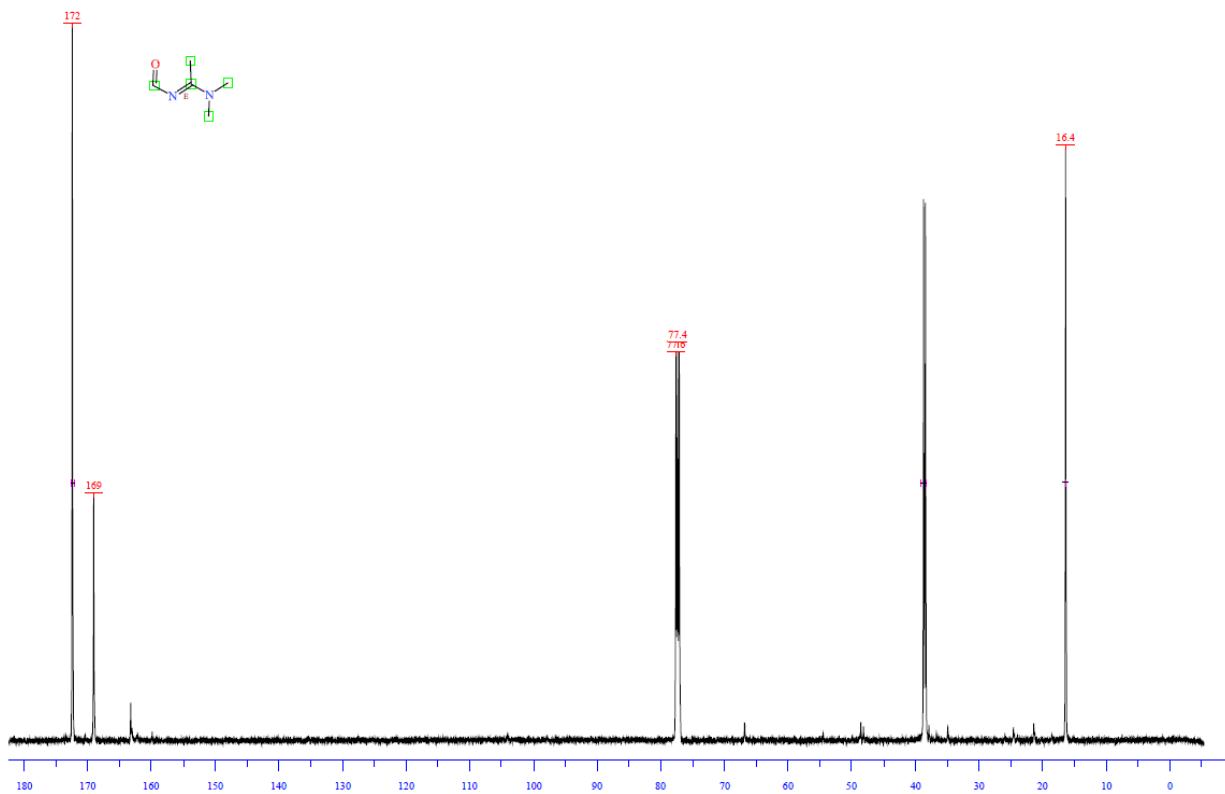

pure:

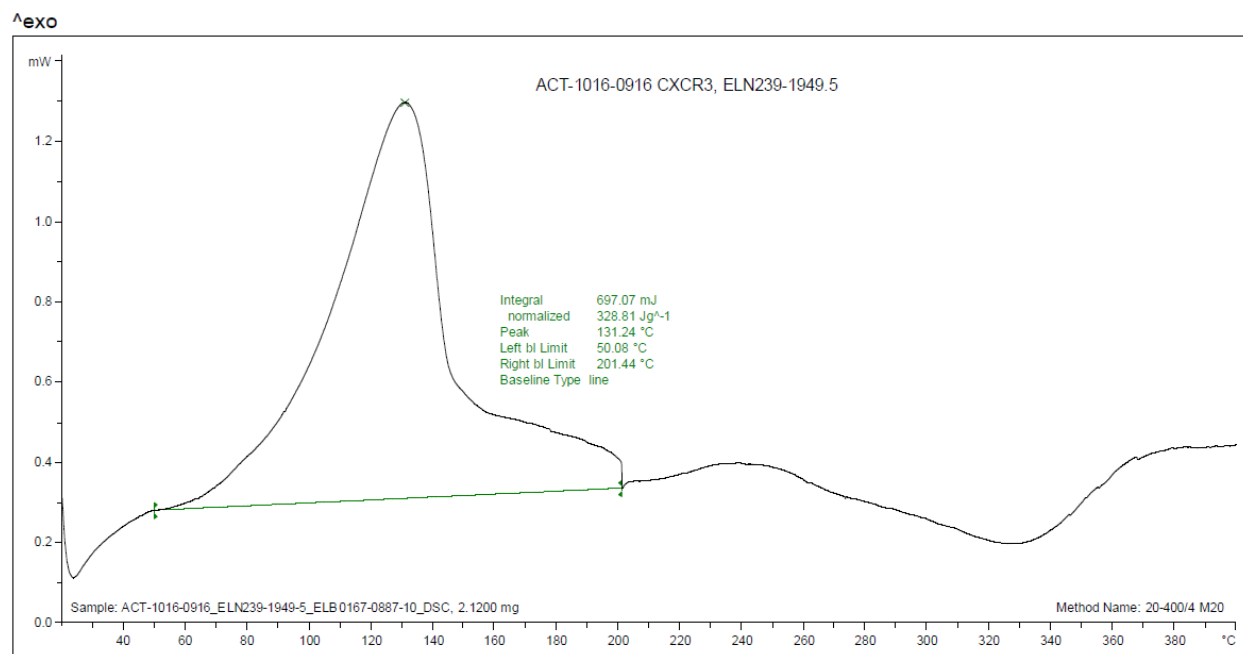

ACTELION: Preformulation

STAR® SW 13.00

in dioxane:

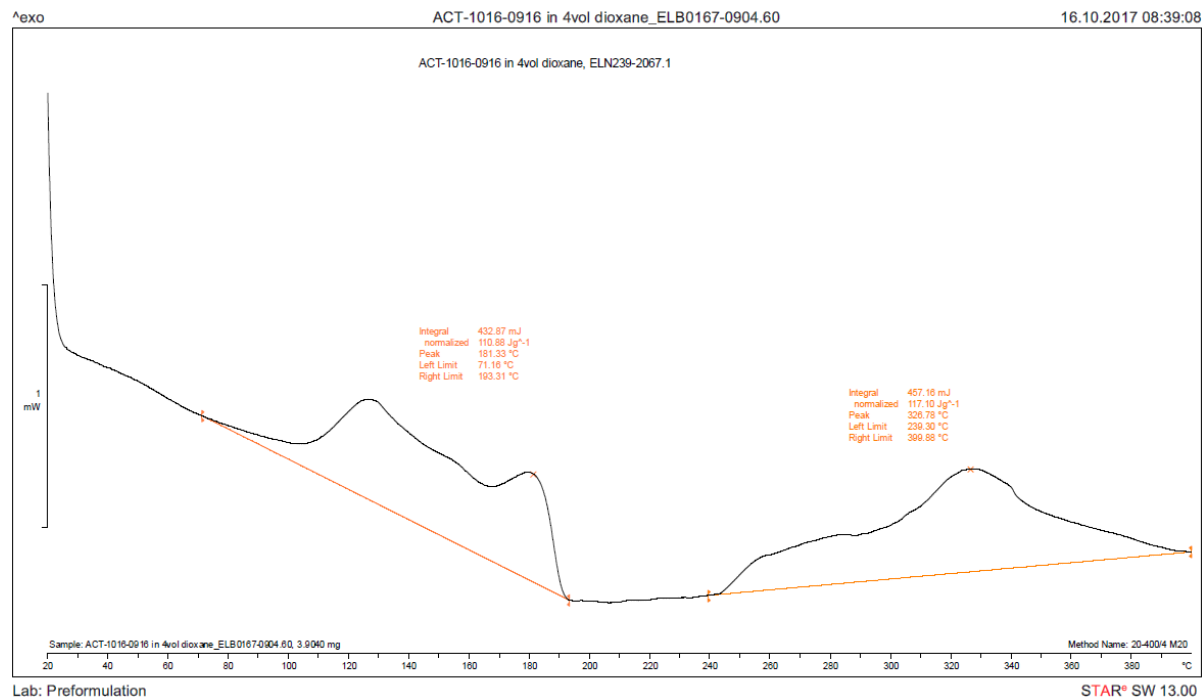

in DMSO:

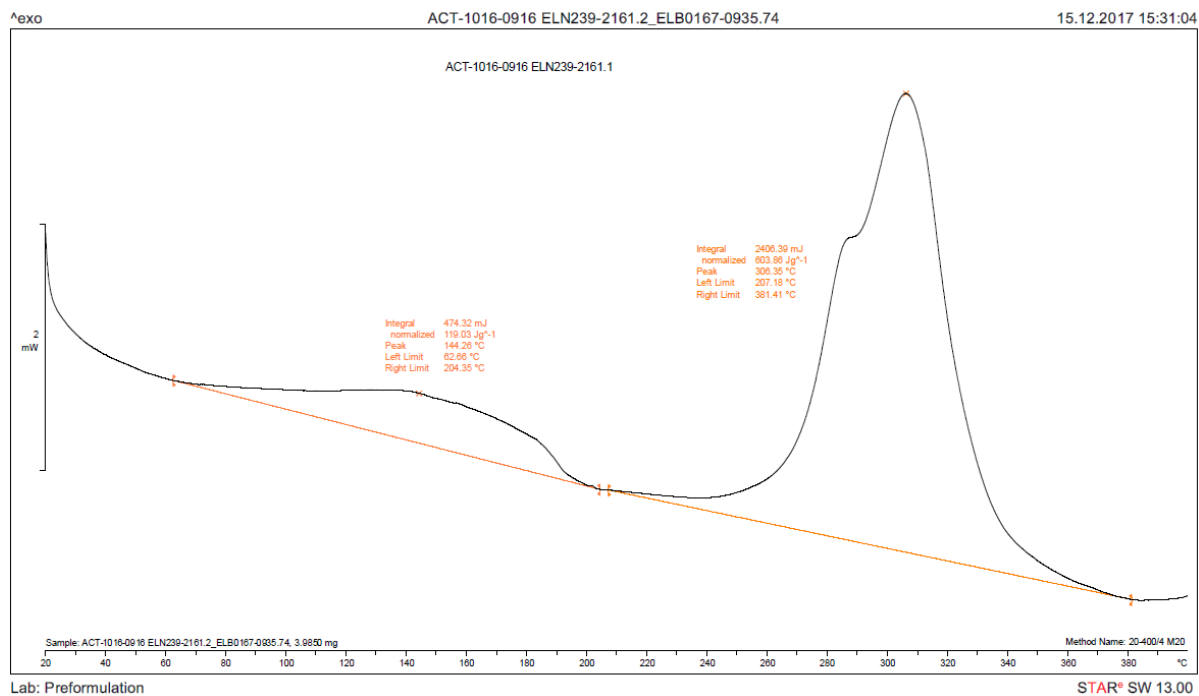

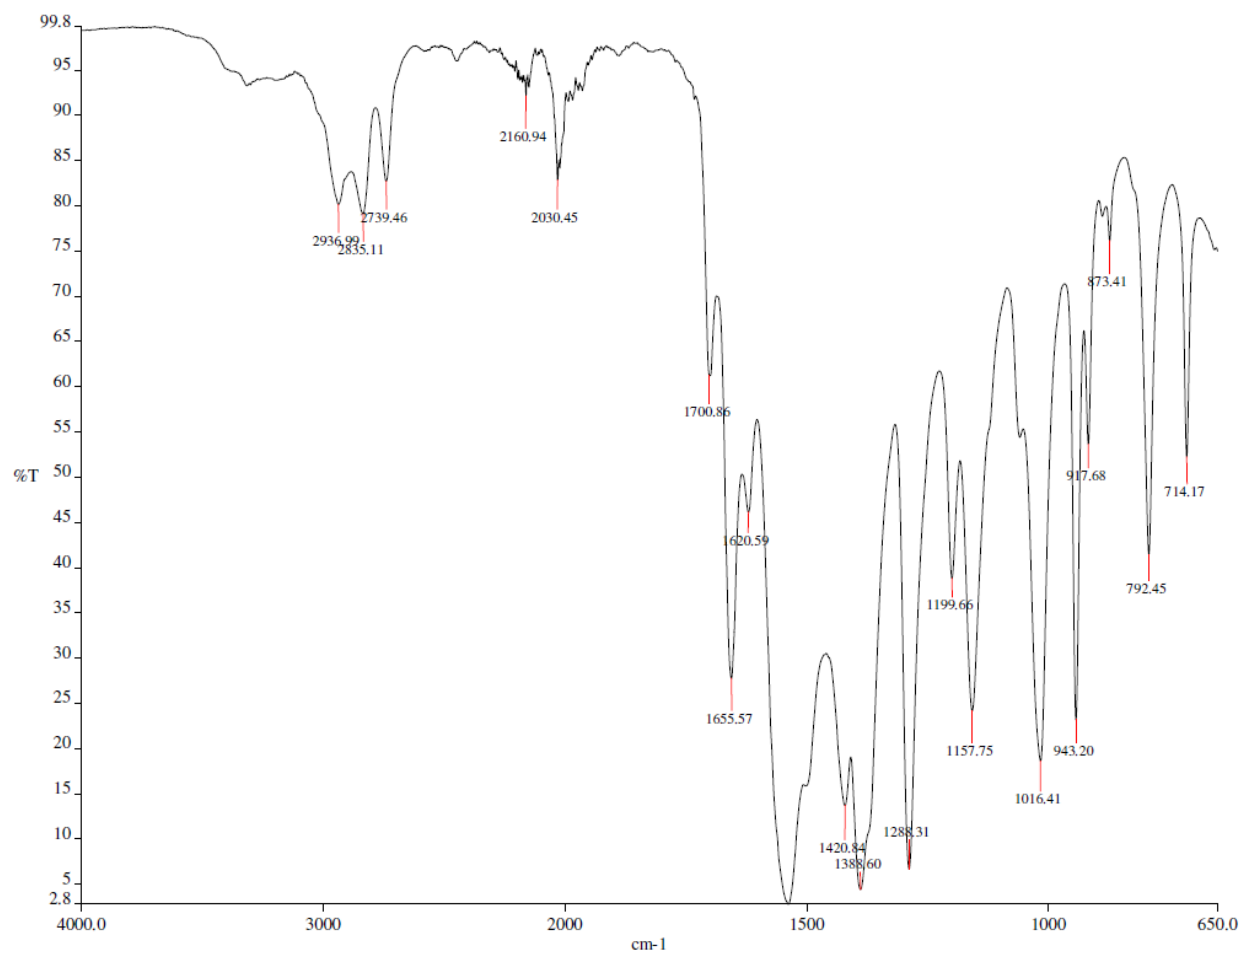

ethyl 2-(3-methyl-1*H*-1,2,4-triazol-1-yl)acetate

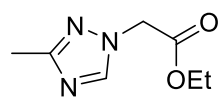

**11b**

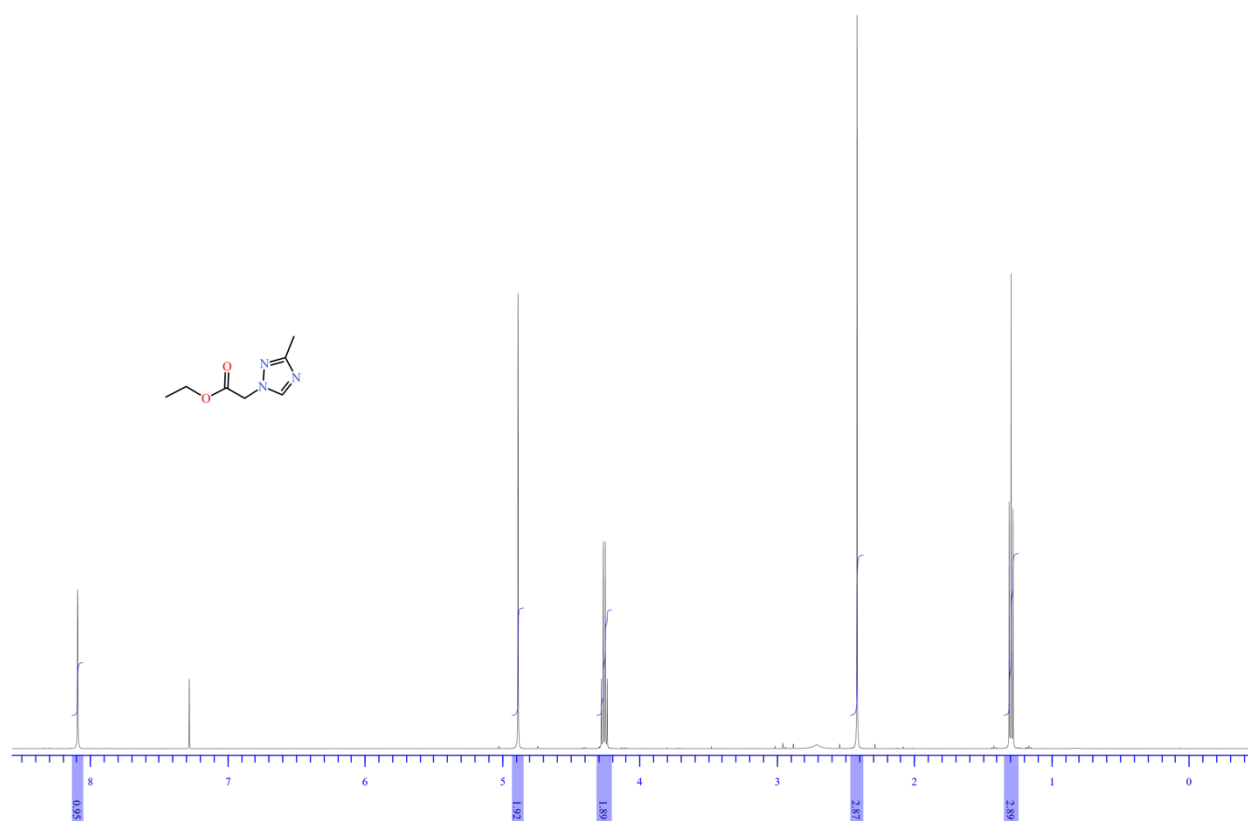

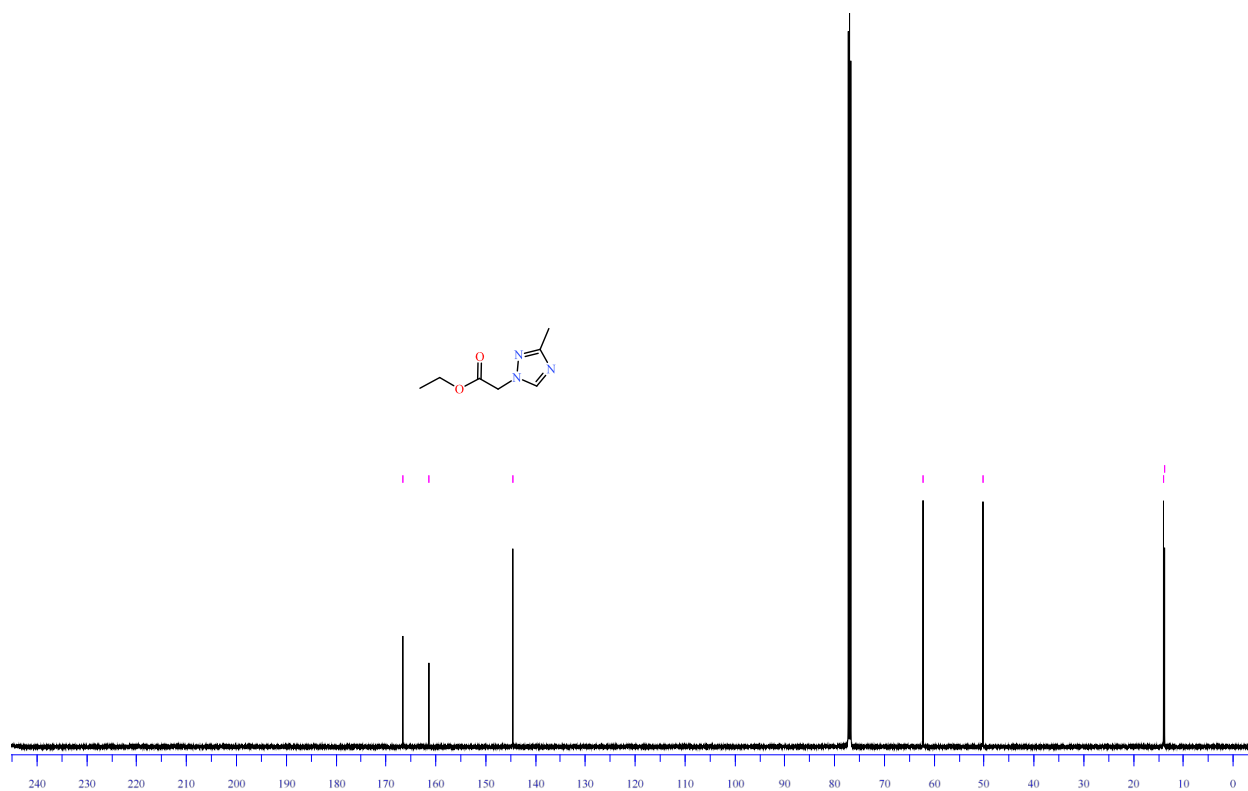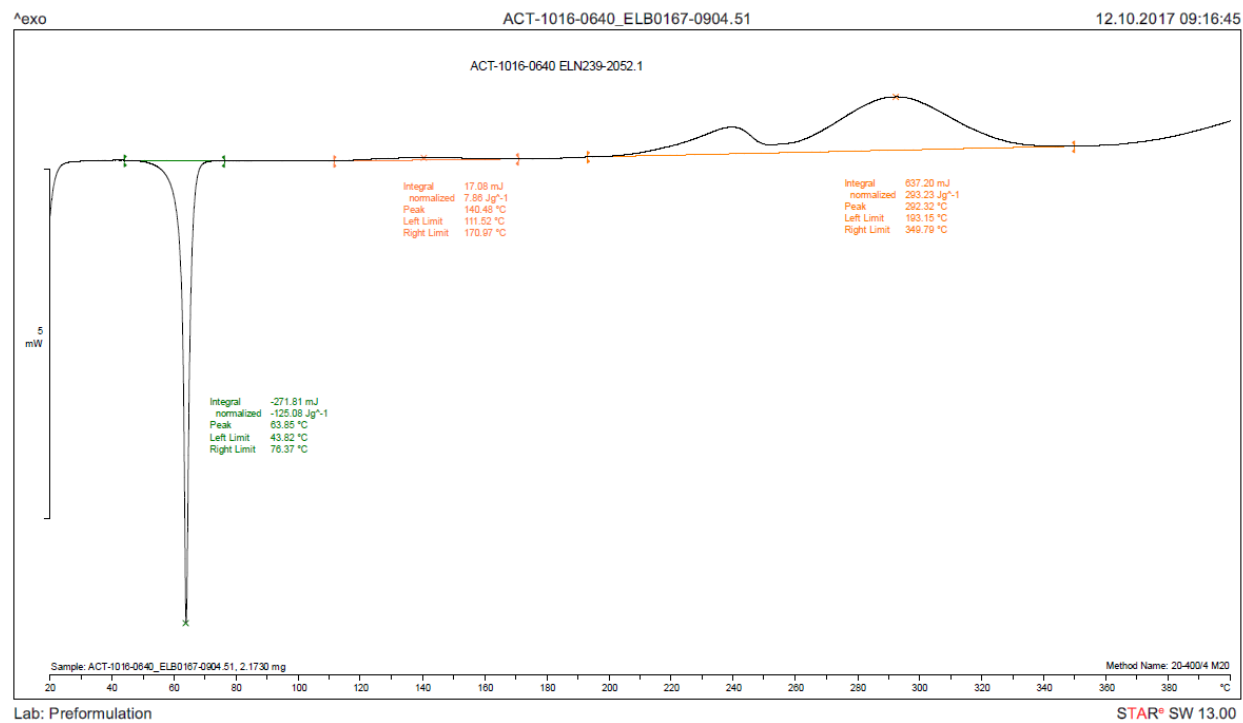

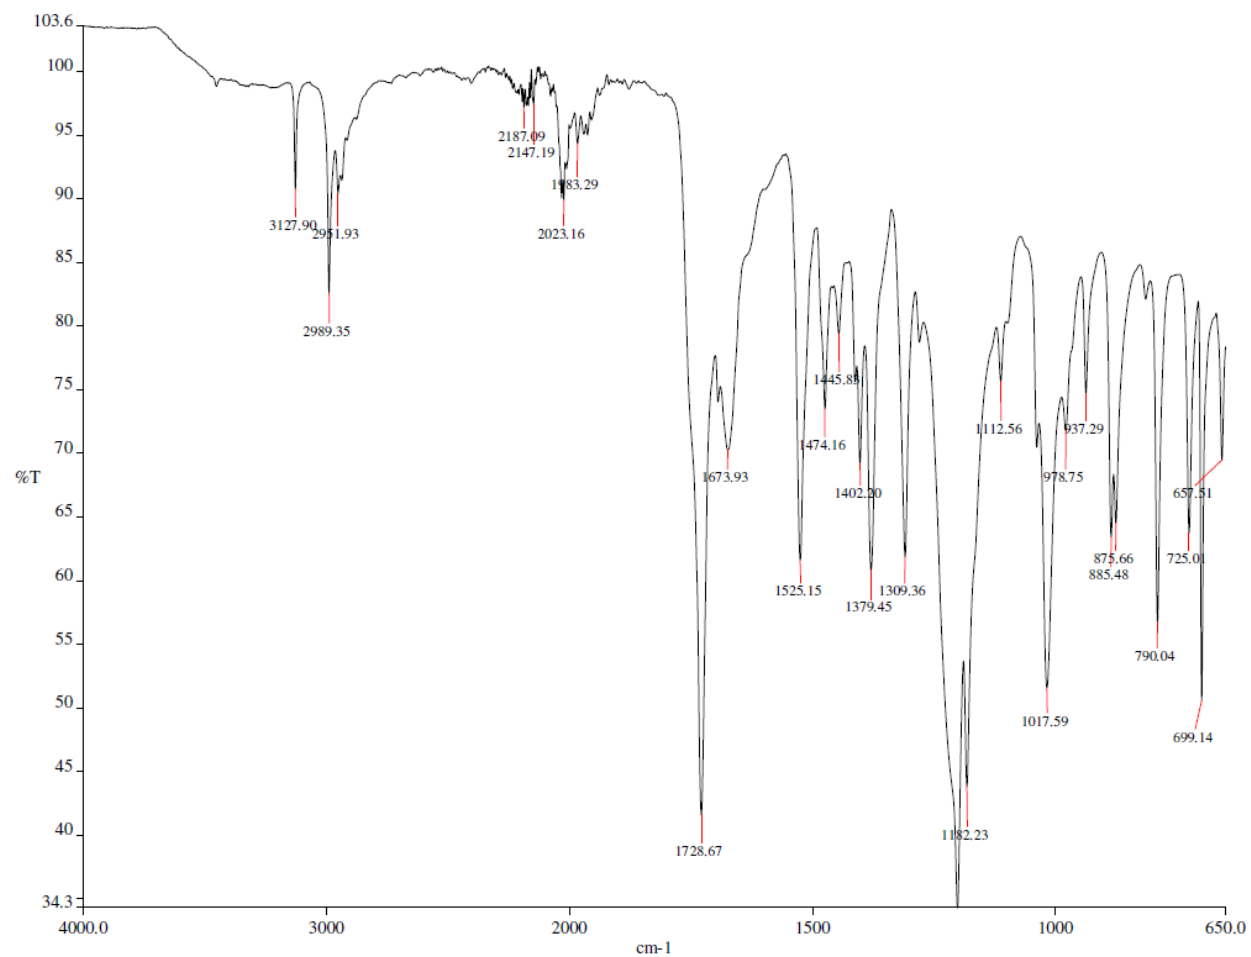

**2-(3-methyl-1*H*-1,2,4-triazol-1-yl) acetate sodium(I) salt**

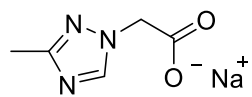

**12**

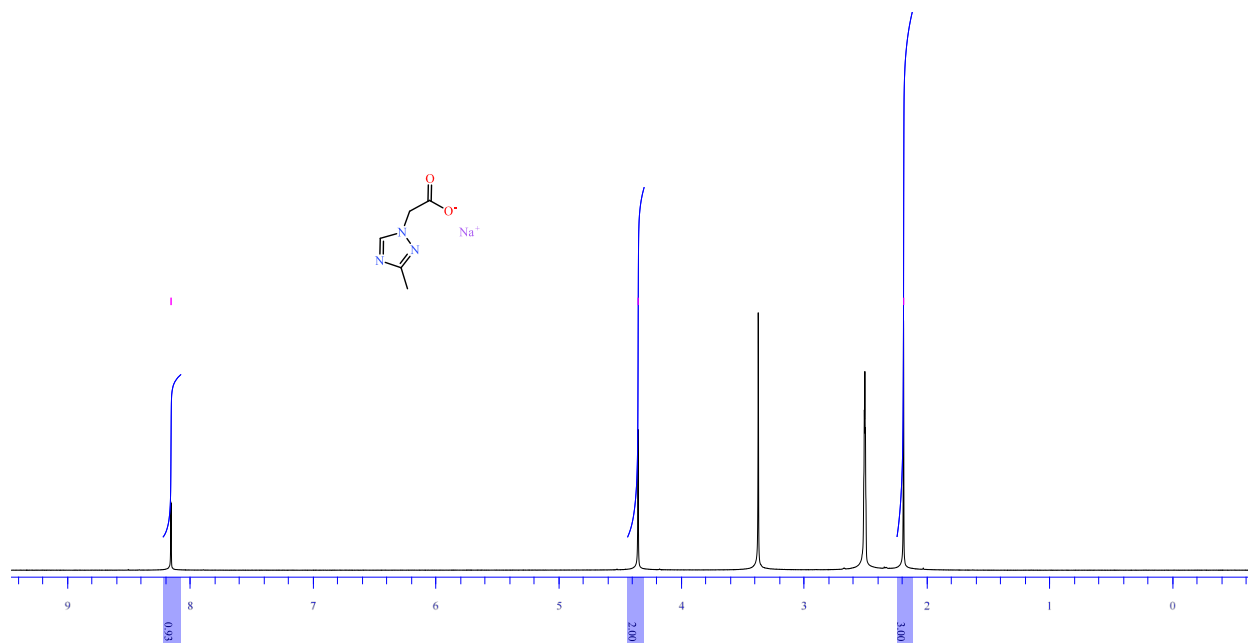



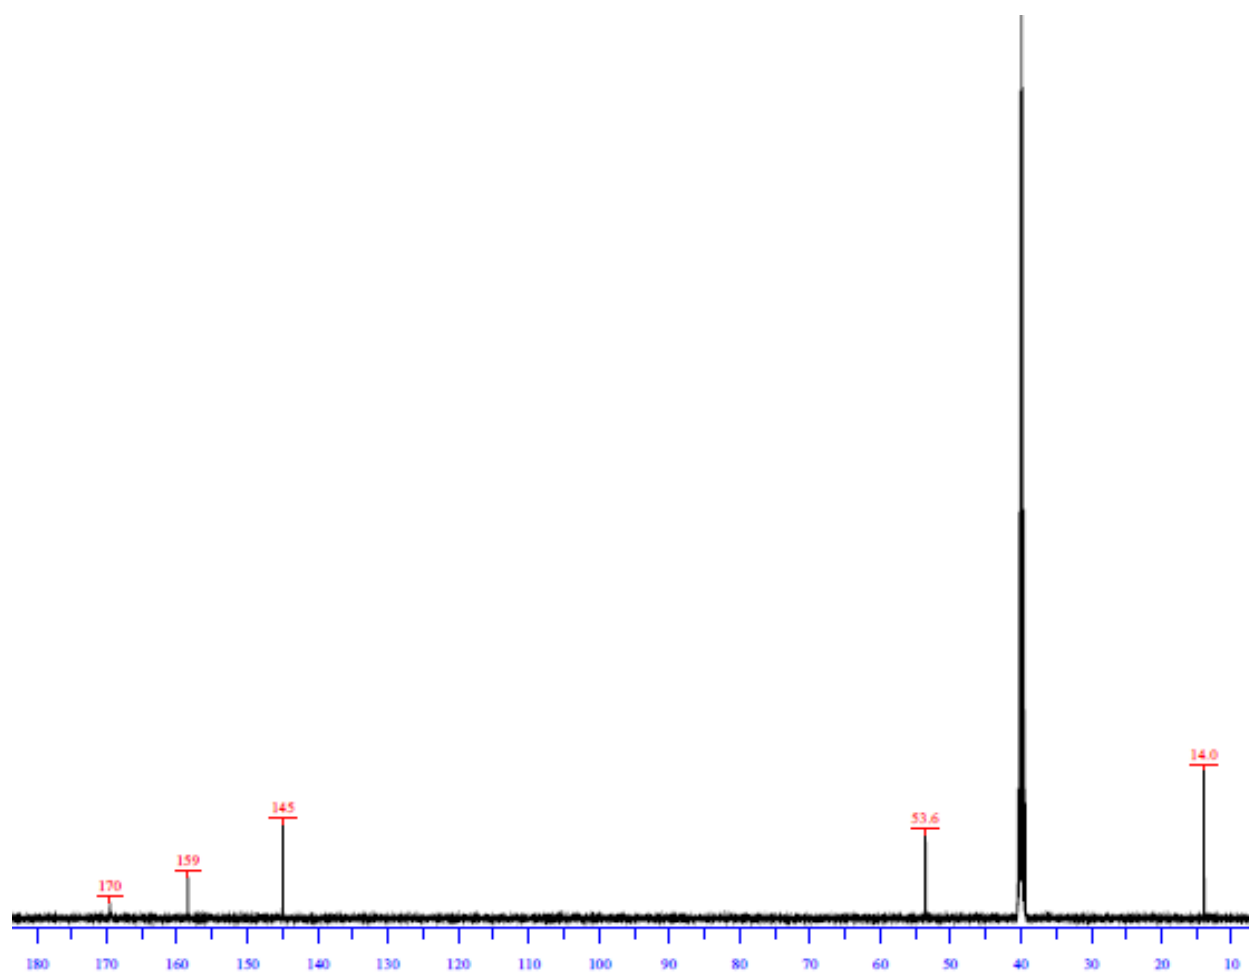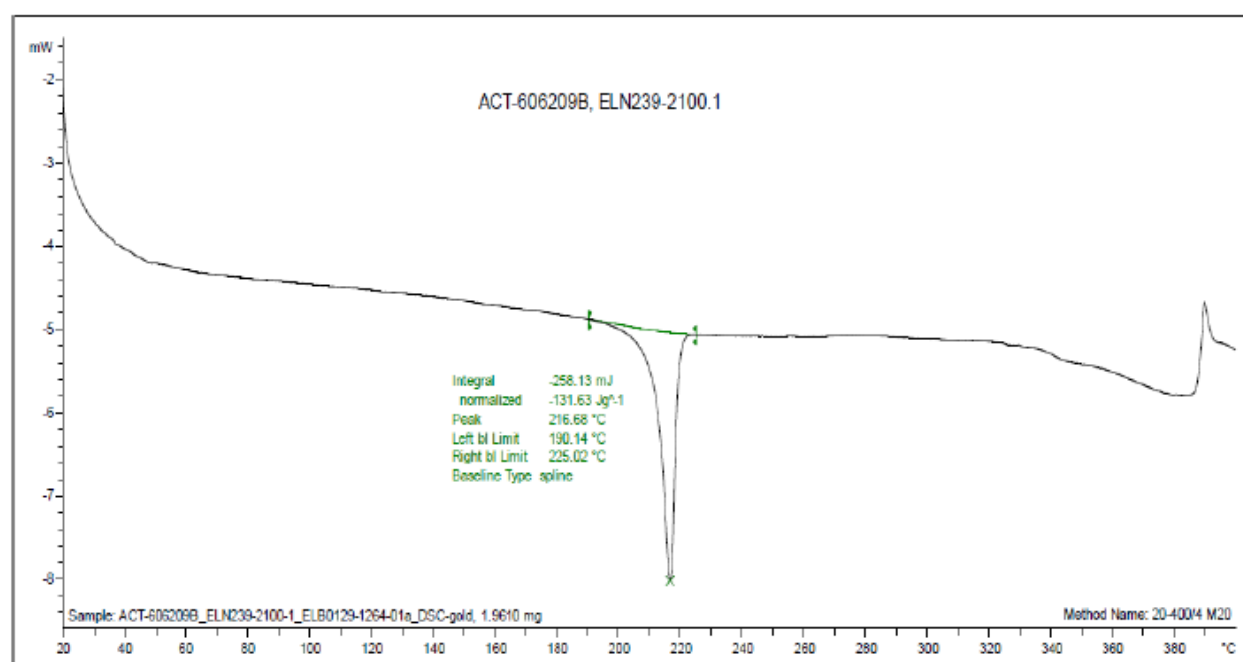

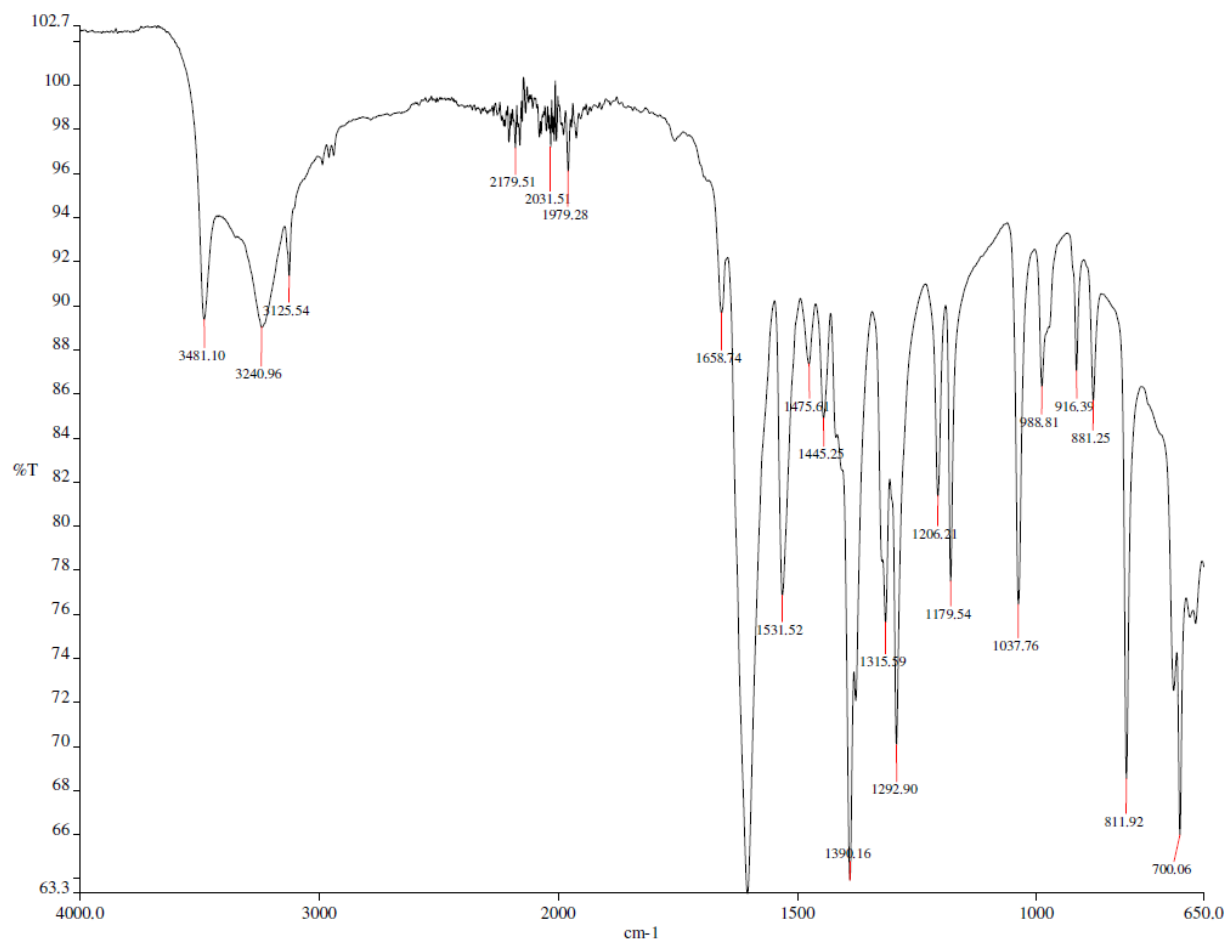

Supplement: c9gc04286e1.pdf [file c9gc04286e1.pdf]
